# Supplementary material
Source: PubMed Central journal article supplement (PMC4408948)

## Web Material legends

**Web Figure 1.** Predicted CES-D score trajectory from mixed-effects regression model for five levels of n-3:n-6 PUFA ratio, among women

**Web Figure 2.** Predicted CES-D score trajectory from mixed-effects regression model for five levels of n-3:n-6 PUFA ratio, among men

**Web Figure. 3.** Predicted CES-D score trajectory from mixed-effects regression model for five levels of n-3 HUFA:n-6 PUFA ratio, among women

**Web Figure. 4.** Predicted CES-D score trajectory from mixed-effects regression model for five levels of n-3 HUFA:n-6 PUFA ratio, among men

**Web Figure. 5.** Predicted CES-D score trajectory from mixed-effects regression model for five levels of n-3:n-6 HUFA ratio, among women

**Web Figure. 6.** Predicted CES-D score trajectory from mixed-effects regression model for five levels of n-3:n-6 HUFA ratio, among men

**Web TABLE 1.** Analysis of baseline *n*-3 fatty acid absolute exposures and longitudinal change in CES-D component scores (both sexes combined), mixed-effects linear regression analysis, HANDLS study, Baltimore, MD, 2004-2013

**Web Figure. 7.** n-3:n-6 PUFA vs. high omega-3 fish consumption and intake of oils

1 Oz cooked lean meat from fish, other seafood high in n-3 fatty acids.

2 Grams of discretionary Oil.

**URL for MEPED 2.0:** [http://www.ars.usda.gov/SP2UserFiles/Place/12355000/pdf/mped/mped2\\_doc.pdf](http://www.ars.usda.gov/SP2UserFiles/Place/12355000/pdf/mped/mped2_doc.pdf)

Web Figure. 1.

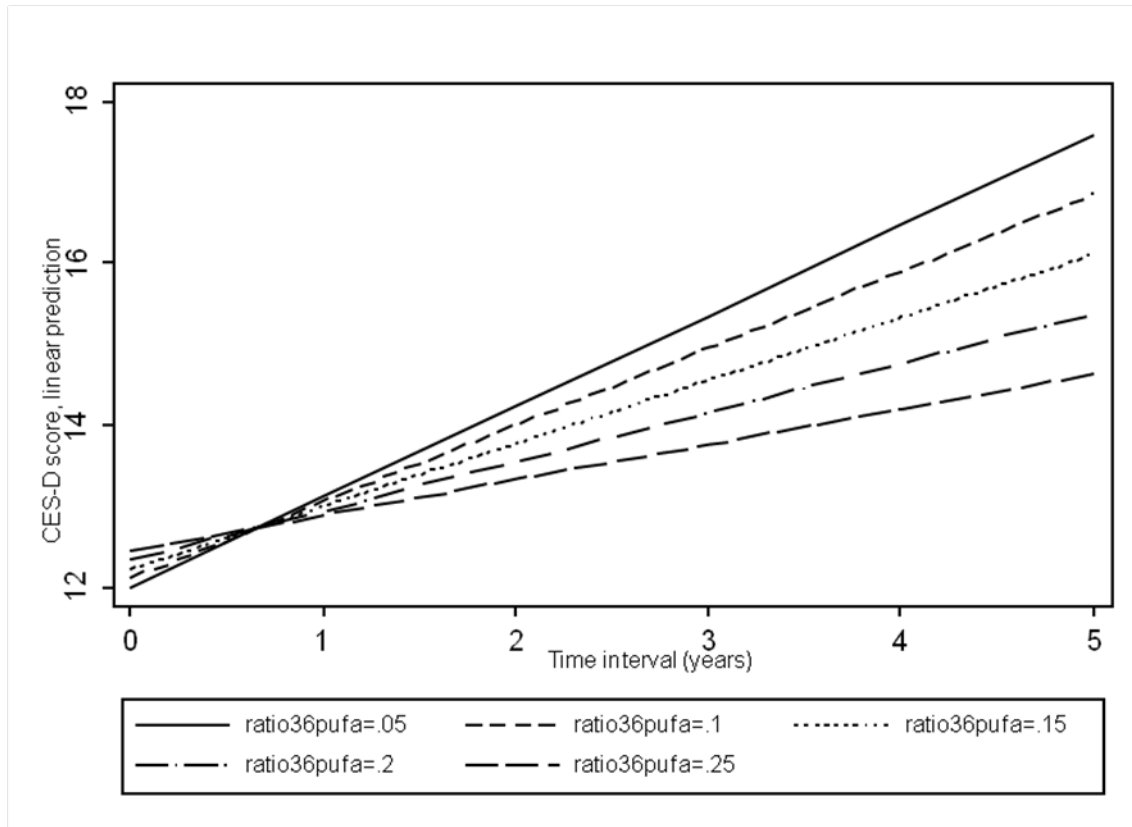

Web Figure 2

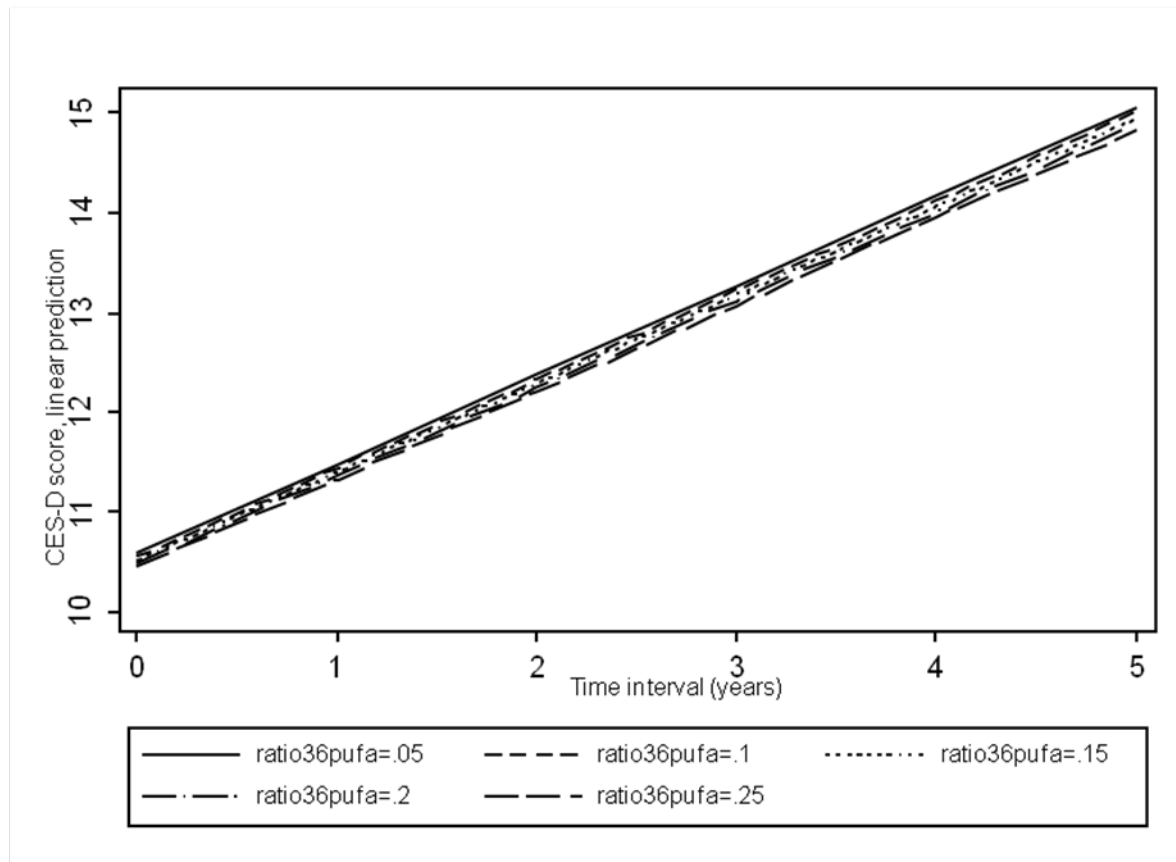

Web Figure. 3.

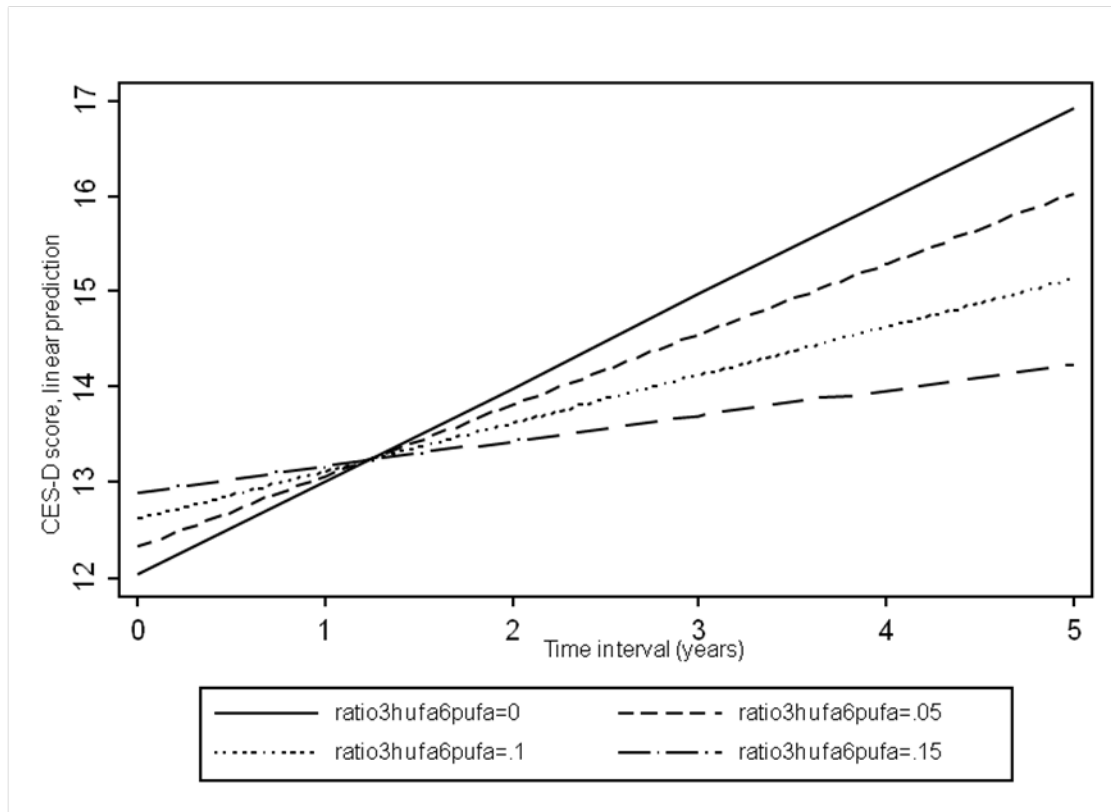

Web Figure. 4.

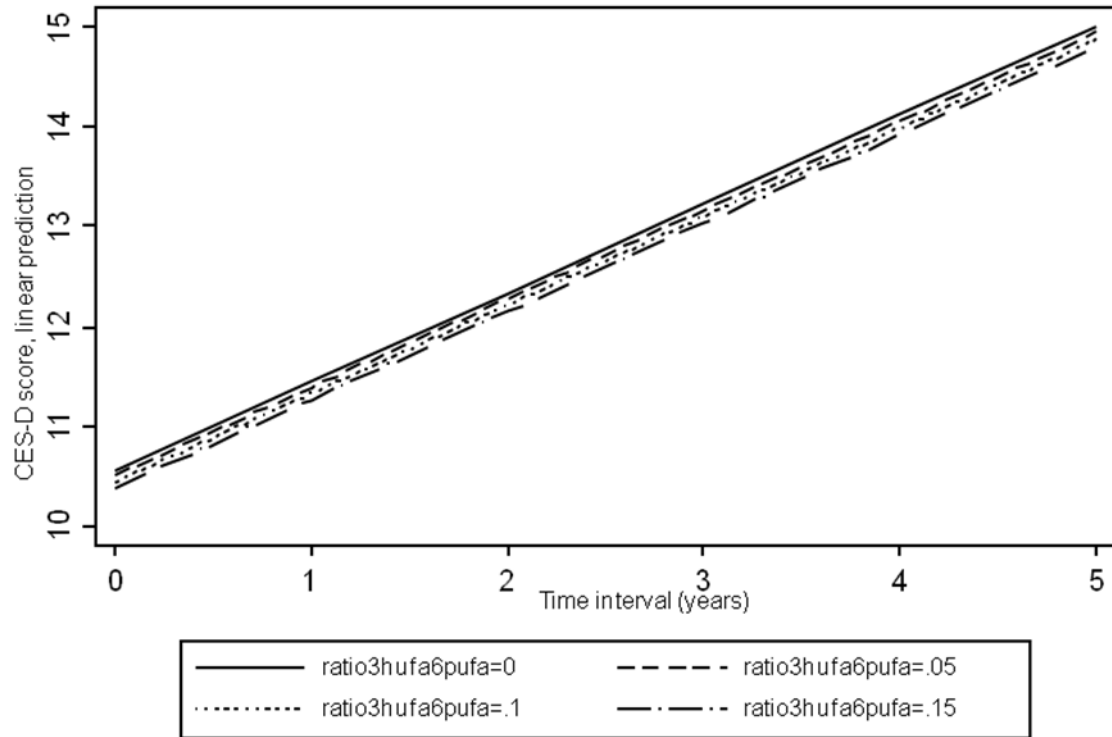

Web Figure 5.

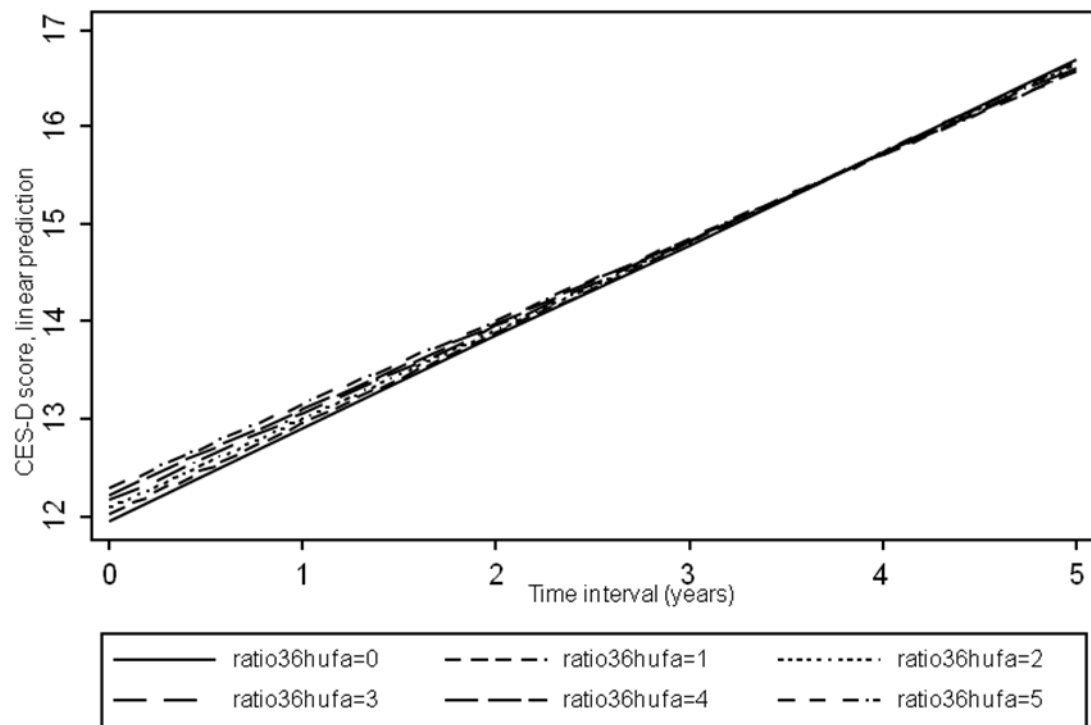

Web Figure 6.

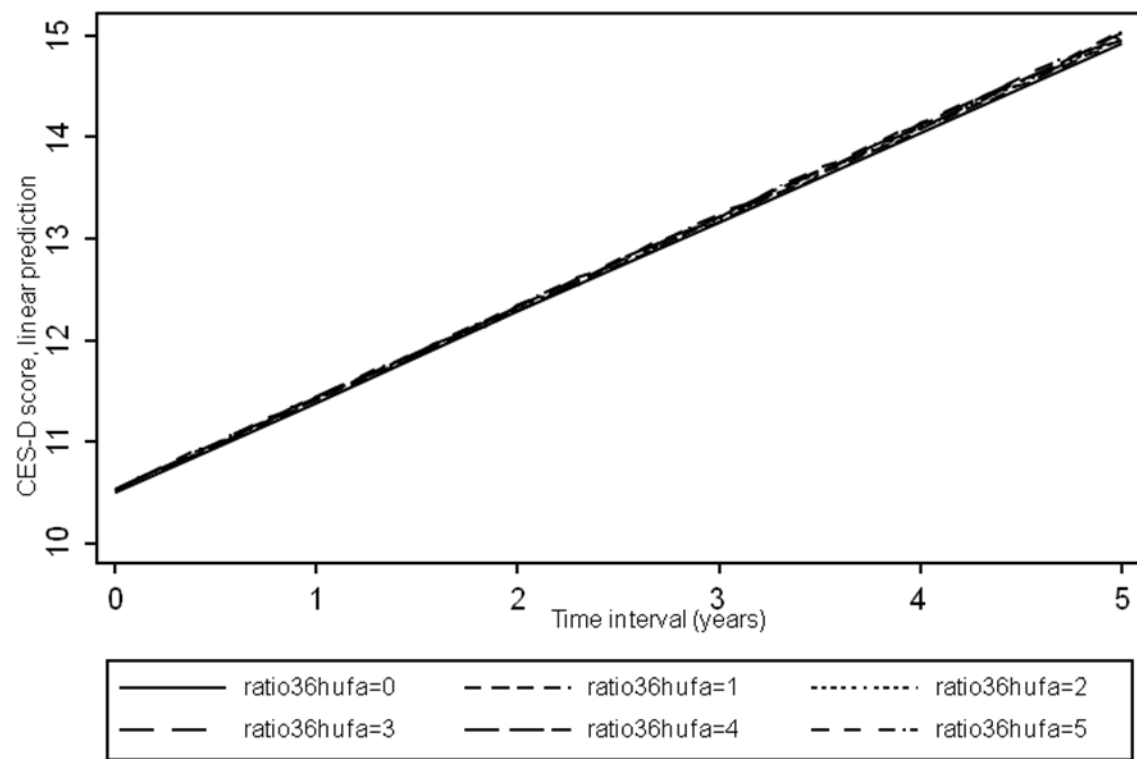

Web TABLE 1.

|                                                  | n-3 HUFA (% energy) <sup>a,b</sup> |                 | n-3 PUFA (% energy) <sup>a,b</sup> |                 |
|--------------------------------------------------|------------------------------------|-----------------|------------------------------------|-----------------|
|                                                  | $\gamma \pm \text{SEE}$            | p-value         | $\gamma \pm \text{SEE}$            | p-value         |
| <b>CES-D component 1:<br/>Somatic complaints</b> | <b>N=2,053</b>                     | <b>N'=3,341</b> | <b>N=2,052</b>                     | <b>N'=3,340</b> |
| <b>Fixed effect</b>                              |                                    |                 |                                    |                 |
| Intercept                                        | +9.02±0.64                         | <0.001          | +9.15±0.66                         | <0.001          |
| Time                                             | +1.37±0.15                         | <0.001          | +1.39±0.16                         | <0.001          |
| Age <sub>base</sub>                              | -0.02±0.01                         | 0.031           | -0.02±0.01                         | 0.035           |
| Age <sub>base</sub> xTime                        | +0.00±0.00                         | 0.14            | +0.00±0.00                         | 0.14            |
| n-3 exposure                                     | +0.37±0.43                         | 0.40            | -0.14±0.24                         | 0.56            |
| n-3 exposure xTime                               | -0.12±0.09                         | 0.19            | -0.04±0.06                         | 0.51            |
| <b>Random effects</b>                            |                                    |                 |                                    |                 |
| Level 1 residuals                                | +3.03±0.08                         | <0.001          | +3.03±0.08                         | <0.001          |
| Level 2 residuals                                |                                    |                 |                                    |                 |
| Intercept                                        | +2.89±0.09                         | <0.001          | +2.89±0.09                         | <0.001          |
| Linear slope                                     | +0.11±0.14                         | <0.001          | +0.12±0.13                         | <0.001          |
| <b>CES-D component 2:<br/>Depressed affect</b>   | <b>N=2,049</b>                     | <b>N'=3,337</b> | <b>N=2,049</b>                     | <b>N'=3,337</b> |
| <b>Fixed effect</b>                              |                                    |                 |                                    |                 |
| Intercept                                        | +6.90±0.63                         | <0.001          | +7.12±0.65                         | <0.001          |
| Time                                             | +1.08±0.15                         | <0.001          | +1.05±0.16                         | <0.001          |
| Age <sub>base</sub>                              | -0.02±0.01                         | 0.19            | -0.01±0.01                         | 0.21            |
| Age <sub>base</sub> xTime                        | +0.00±0.00                         | 0.15            | +0.00±0.00                         | 0.16            |
| n-3 exposure                                     | +0.24±0.43                         | 0.58            | -0.29±0.24                         | 0.27            |
| n-3 exposure xTime                               | -0.08±0.09                         | 0.41            | -0.04±0.06                         | 0.51            |
| <b>Random effects</b>                            |                                    |                 |                                    |                 |
| Level 1 residuals                                | +2.81±0.09                         | <0.001          | +2.81±0.09                         | <0.001          |
| Level 2 residuals                                |                                    |                 |                                    |                 |
| Intercept                                        | +3.02±0.09                         | <0.001          | +3.01±0.09                         | <0.001          |
| Linear slope                                     | +0.28±0.09                         | <0.001          | +0.28±0.06                         | <0.001          |
| <b>CES-D component 3:<br/>Positive affect</b>    | <b>N=2,051</b>                     | <b>N'=3,338</b> | <b>N=2,051</b>                     | <b>N'=3,338</b> |
| <b>Fixed effect</b>                              |                                    |                 |                                    |                 |



|                            |            |        |            |        |
|----------------------------|------------|--------|------------|--------|
| Intercept                  | +8.53±0.39 | <0.001 | +8.34±0.40 | <0.001 |
| Time                       | +0.63±0.10 | <0.001 | +0.63±0.10 | <0.001 |
| Age <sub>base</sub>        | +0.02±0.01 | 0.004  | +0.02±0.01 | 0.006  |
| Age <sub>base</sub> xTime  | -0.00±0.00 | 0.22   | -0.00±0.00 | 0.22   |
| <i>n</i> -3 exposure       | +0.14±0.26 | 0.61   | +0.28±0.15 | 0.05   |
| <i>n</i> -3 exposure xTime | +0.02±0.06 | 0.75   | -0.01±0.03 | 0.73   |
| <b>Random effects</b>      |            |        |            |        |
| Level 1 residuals          | +1.84±0.05 | <0.001 | +1.84±0.05 | <0.001 |
| Level 2 residuals          |            |        |            |        |
| Intercept                  | +1.74±0.06 | <0.001 | +1.74±0.06 | <0.001 |
| Linear slope               | +0.13±0.05 | <0.001 | +0.13±0.04 | <0.001 |

---

|                                                      |                |                 |                |                 |
|------------------------------------------------------|----------------|-----------------|----------------|-----------------|
| <b>CES-D component 4:<br/>Interpersonal problems</b> | <b>N=2,051</b> | <b>N'=3,344</b> | <b>N=2,051</b> | <b>N'=3,344</b> |
|------------------------------------------------------|----------------|-----------------|----------------|-----------------|

---

**Fixed effect**

|                            |            |        |            |        |
|----------------------------|------------|--------|------------|--------|
| Intercept                  | +1.39±0.20 | <0.001 | +1.41±0.21 | <0.001 |
| Time                       | +0.38±0.05 | <0.001 | +0.39±0.05 | <0.001 |
| Age <sub>base</sub>        | -0.01±0.00 | 0.033  | -0.01±0.00 | 0.035  |
| Age <sub>base</sub> xTime  | +0.00±0.00 | 0.003  | +0.00±0.00 | 0.003  |
| <i>n</i> -3 exposure       | +0.06±0.13 | 0.64   | -0.02±0.08 | 0.83   |
| <i>n</i> -3 exposure xTime | -0.02±0.03 | 0.51   | -0.01±0.02 | 0.64   |

**Random effects**

|                   |            |        |            |        |
|-------------------|------------|--------|------------|--------|
| Level 1 residuals | +0.99±0.03 | <0.001 | +1.00±0.03 | <0.001 |
| Level 2 residuals |            |        |            |        |
| Intercept         | +0.88±0.03 | <0.001 | +0.88±0.03 | <0.001 |
| Linear slope      | +0.10±0.02 | <0.001 | +0.10±0.02 | <0.001 |

---

*Abbreviations:* AA=Arachidonic acid; ALA=α-linolenic acid; CES-D=Center for Epidemiologic Studies-Depression scale; DHA=Docosahexaenoic acid; DPA=Docosapentaenoic acid EPA=Eicosapentaenoic acid; HANDLS=Healthy Aging in Neighborhoods of Diversity Across the Lifespan; HS=High School; HUFA=highly unsaturated fatty acids; LA=Linoleic acid; *n*-3=omega-3; *n*-6=omega-6; PIR=Poverty Income Ratio; PUFA=polyunsaturated fatty acids; SEM=standard error of the mean.

<sup>a</sup> Models were further adjusted for other covariates (main effects and interaction with time). See methods section for more details on covariate coding and model specifications. Time at baseline visit was set to zero. Baseline age was centered at 50y, total energy intake at 2000kcal/d, total

carotenoid intake at 3mg/1,000kcal/d, vitamin C intake at 30mg/1,000kcal/d, vitamin A intake at 300 RE/1,000 kcal/d, vitamin E at 3 mg/1,000 kcal/d, vitamin B-6 at 0.8 mg/1,000 kcal/d, vitamin B-12 at 3 µg/1,000 kcal/d, folate at 170 µg/1,000 kcal/d. <sup>b</sup> N=number of participants in the analysis; N'=total number of visits included in the analysis.

Web Figure 7.

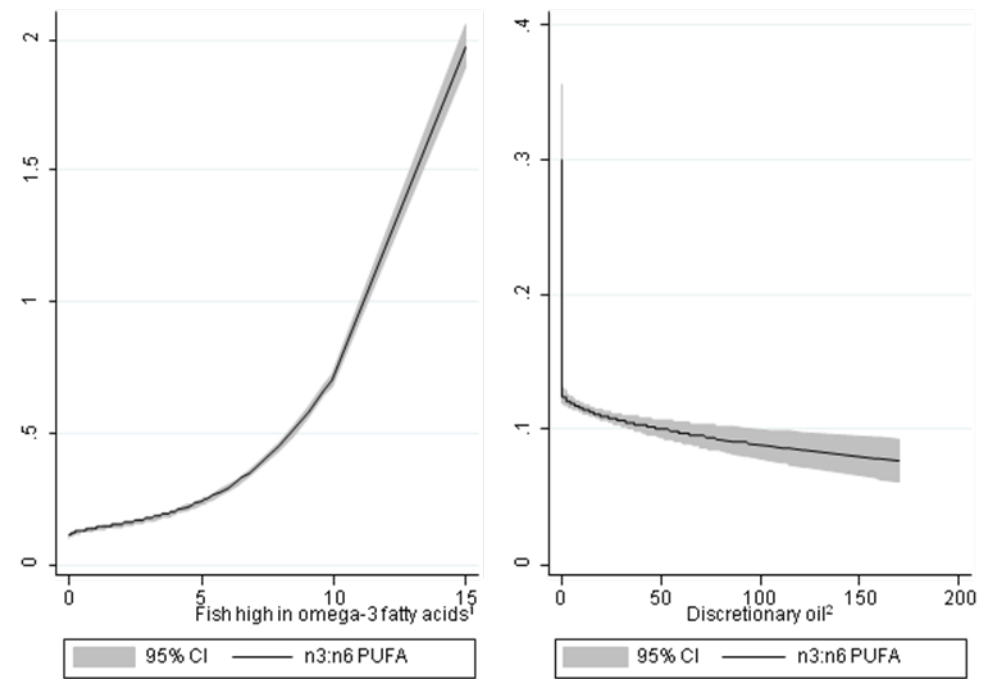

Supplement: supp_kwu334_kwu334supp.pdf [file supp_kwu334_kwu334supp.pdf]
